# Supplementary material for: Comparative proteomic analysis of a membrane-enriched fraction from flag leaves reveals responses to chemical hybridization agent SQ-1 in wheat
Source: Front Plant Sci. 2015 Aug 26;6:669. doi: 10.3389/fpls.2015.00669 (PMC4549638; doi:10.3389/fpls.2015.00669)
Supplement: Supplementary file 5 [file Table_5.XLS]

## Sheet: Sheet1
Table S5 Differentially expressed proteins (DEPs) blasted against the TAIR database and subcellular localization
Spots in red: unmatched homologous proteins blasted against the TAIR database.
C: cytosolic; ER: endoplasmic reticulum; G: glogi; V: vacuole; N: nucleus; E: extracellular; M: mitochondrion; P: plastid; CE:chloroplast envelope; TM: thylakoid membrane; CW: cell wall; Cl:chloroplast; PM: plasma membrane; VM: vacuole membrane; MM: mitochondrion membrane; R:ribosome; CS: chloroplast stroma;Tl: thylakoid lumen
Spot no.	NCBI ID	TAIR ID of homologue	TAIR name of homologue	E-value	Identities	Positives	Gaps	Score	Subcellular localization
101, 102	GLNA2_HORVU	AT5G35630	Glutamine synthetase	0	322/386 (83%)	358/386 (93%)	1/386 (0%)	689	TM | P | PM
65	P2SAF_ORYSJ	AT5G23120	Photosystem II stability/assembly factor HCF136	0	283/352 (80%)	315/352 (89%)	24/352 (7%)	587	TM | Tl | CS
104	PGKH_WHEAT	AT1G56190	Phosphoglycerate kinase 2	0	377/435 (87%)	403/435 (93%)	1/435 (0%)	757	PM | P | M
138	PR2E2_ORYSJ	AT3G52960	Peroxiredoxin-2E	5e-94	140/215 (65%)	170/215 (79%)	8/215 (4%)	278	CE | CW | P
133	PSBO_WHEAT	AT3G50820	Oxygen-evolving enhancer protein 1-2	5e-175	249/331 (75%)	279/331 (84%)	8/331 (2%)	492	TM
32	PSBP_WHEAT	AT1G06680	Oxygen-evolving enhancer protein 2-1	3e-118	173/266 (65%)	211/266 (79%)	11/266 (4%)	343	TM
36	RBL_WHEAT	ATCG00490	Ribulose bisphosphate carboxylase large chain	0	441/476 (93%)	460/476 (97%)	0/476 (0%)	912	P | PM
39	RBS1_WHEAT	AT1G67090	Ribulose bisphosphate carboxylase small chain 1A	2e-82	111/171 (65%)	139/171 (81%)	5/171 (3%)	245	TM
29, 42, 93	RCAA_HORVU	AT2G39730	Ribulose bisphosphate carboxylase/oxygenase activase	0	361/460 (78%)	402/460 (87%)	9/460 (2%)	754	Cl
88	SERA1_ARATH	AT4G34200	D-3-phosphoglycerate dehydrogenase 1	0	603/603 (100%)	603/603 (100%)	0/603 (0%)	1208	M
80	TOC75_ORYSJ	AT3G46740	Protein TOC75-3	0	506/694 (73%)	589/694 (85%)	4/694 (1%)	1080	P | PM
71, 141	UCRIA_WHEAT	AT4G03280	Cytochrome b6-f complex iron-sulfur subunit	6e-95	158/231 (68%)	180/231 (78%)	13/231 (6%)	281	TM | PM
131	UEV1C_ARATH	AT2G36060	Ubiquitin-conjugating enzyme E2 variant 1C	2e-107	145/145 (100%)	145/145 (100%)	0/145 (0%)	306	C | N | PM
6	RUBA_WHEAT	AT2G28000	Chaperonin 60 subunit alpha 1	0	444/524 (85%)	490/524 (94%)	0/524 (0%)	897	CE | M | P | PM
1, 33, 34	ATPA_WHEAT	ATCG00120	ATP synthase subunit alpha	0	434/504 (86%)	461/504 (91%)	0/504 (0%)	871	TM | MM
35, 64, 66	ATPB_WHEAT	ATCG00480	ATP synthase subunit beta	0	447/498 (90%)	468/498 (94%)	0/498 (0%)	882	TM | MM | PM
75	BAS1_WHEAT	AT5G06290	2-Cys peroxiredoxin BAS1-like	2e-133	185/210 (88%)	199/210 (95%)	2/210 (1%)	379	P
79	gi|556673	AT2G04030	Chaperone protein htpG family protein	0	611/788 (77%)	685/788 (86%)	15/788 (1%)	1197	P | M | PM | N
116	CAHC_HORVU	AT5G14740	Isoform 2 of Beta carbonic anhydrase 2	8e-85	129/214 (60%)	151/214 (71%)	0/214 (0%)	260	TM
81	CLPB2_ORYSJ	AT5G15450	Chaperone protein ClpB3	0	771/910 (85%)	847/910 (93%)	3/910 (0%)	1590	M | P
82, 83	CLPC1_ORYSJ	AT5G50920	Chaperone protein ClpC1	0	782/879 (89%)	831/879 (95%)	1/879 (0%)	1554	CE | TM | PM | P
61	gi|129915	AT1G56190	Phosphoglycerate kinase family protein	0	377/435 (87%)	403/435 (93%)	1/435 (0%)	757	PM | P | M
5, 52, 95	gi|525291	AT5G08680	ATP synthase alpha/beta family protein	0	436/526 (83%)	477/526 (91%)	6/526 (1%)	887	MM
26	gi|7960277	AT2G39730	rubisco activase	0	342/427 (80%)	369/427 (86%)	11/427 (3%)	708	Cl
72, 145	gi|11990901	AT1G67090	ribulose bisphosphate carboxylase small chain 1A	3e-82	111/171 (65%)	138/171 (81%)	4/171 (2%)	244	Cl | PM
142	gi|14017573	ATCG00360	Tetratricopeptide repeat (TPR)-like superfamily protein	2e-84	118/126 (94%)	120/126 (95%)	0/126 (0%)	248	P
73, 147	gi|14017578	ATCG00470	ATP synthase epsilon chain	6e-61	98/133 (74%)	107/133 (80%)	1/133 (1%)	187	PM | TM
111	gi|14017579	ATCG00480	ATP synthase subunit beta	0	447/498 (90%)	468/498 (94%)	0/498 (0%)	882	TM | MM | PM
30	gi|14017580	ATCG00490	ribulose-bisphosphate carboxylases	0	441/476 (93%)	460/476 (97%)	0/476 (0%)	912	P | PM
150	gi|14017588	ATCG00580	photosystem II reaction center protein E	9e-52	80/83 (96%)	80/83 (96%)	0/83 (0%)	160	TM
134	gi|18650668	AT5G58070	temperature-induced lipocalin	4e-100	138/182 (76%)	154/182 (85%)	1/182 (1%)	291	PM | VM | M
10, 12	gi|20302471	AT1G20020	ferredoxin-NADP(+)-oxidoreductase 2	0	252/318 (79%)	283/318 (89%)	0/318 (0%)	550	TM
14, 62, 63	gi|20302473	AT5G66190	ferredoxin-NADP(+)-oxidoreductase 1	0	279/365 (76%)	308/365 (84%)	7/365 (2%)	550	TM
135	gi|21322655	AT1G72610	germin-like protein 1	2e-78	119/193 (62%)	145/193 (75%)	3/193 (2%)	237	E
106, 125	gi|37783283	AT2G39730	rubisco activase	2e-116	158/201 (79%)	178/201 (89%)	0/201 (0%)	343	Cl
114	gi|38570261	AT2G20890	photosystem II reaction center PSB29 protein	5e-132	191/284 (67%)	231/284 (81%)	9/284 (3%)	380	TM | CE
146	gi|52548250	AT1G10630	ADP-ribosylation factor A1F	3e-130	175/181 (97%)	179/181 (99%)	0/181 (0%)	367	PM | VM
144	gi|60100214	AT3G17020	Adenine nucleotide alpha hydrolases-like superfamily protein	5e-68	94/160 (59%)	127/160 (79%)	0/160 (0%)	207	PM | VM
2, 51	gi|81176509	ATMG01190	ATP synthase subunit 1	0	464/506 (92%)	482/506 (95%)	2/506 (0%)	947	MM | PM
44	gi|82582811	AT5G56000	HEAT SHOCK PROTEIN 81.4	0	598/655 (91%)	637/655 (97%)	2/655 (0%)	1133	PM | C | N
76	gi|86439712	AT1G55670	photosystem I subunit G	3e-64	105/163 (64%)	123/163 (75%)	23/163 (14%)	197	TM
46, 47, 86	gi|90025017	AT1G78900	vacuolar ATP synthase subunit A	0	556/619 (90%)	580/619 (94%)	0/619 (0%)	1155	VM | PM
148	gi|117670153	AT3G51510	unknown protein	7e-49	81/129 (63%)	104/129 (81%)	1/129 (1%)	159	TM
31	gi|125744990	AT4G38510	ATPase, V1 complex, subunit B protein	0	464/488 (95%)	470/488 (96%)	1/488 (0%)	944	PM | VM
67	gi|225690794	AT3G54890	photosystem I light harvesting complex gene 1	1e-121	164/204 (80%)	176/204 (86%)	0/204 (0%)	350	TM
59	gi|285014508	AT4G04640	ATPase, F1 complex, gamma subunit protein	0	249/371 (67%)	309/371 (83%)	16/371 (4%)	517	TM | CE
20	gi|312451712	AT5G37710	alpha/beta-Hydrolases superfamily protein	1.8	13/26 (50%)	16/26 (62%)	0/26 (0%)	28.5	PM
78	gi|326499830	AT4G09650	ATP synthase delta-subunit gene	2e-63	106/215 (49%)	144/215 (67%)	7/215 (3%)	201	TM
126	gi|357145828	AT5G38660	acclimation of photosynthesis to environment	6e-118	161/198 (81%)	180/198 (91%)	1/198 (1%)	343	TM
117	gi|473742116	AT1G35680	Ribosomal protein L21	1e-53	98/153 (64%)	117/153 (76%)	4/153 (3%)	174	P | N
110	gi|473753874	AT5G12110	Glutathione S-transferase, C-terminal-like;Translation elongation factor EF1B/ribosomal protein S6	5e-86	150/228 (66%)	171/228 (75%)	26/228 (11%)	260	PM
99	gi|473758990	AT4G01050	thylakoid rhodanese-like	1e-80	138/231 (60%)	171/231 (74%)	7/231 (3%)	255	TM
123	gi|473762973	AT2G04160	Subtilisin-like serine endopeptidase family protein	2e-180	312/679 (46%)	410/679 (60%)	42/679 (6%)	545	CW | E
112, 119	gi|473781575	AT4G09010	ascorbate peroxidase 4	1e-142	201/284 (71%)	230/284 (81%)	1/284 (0%)	412	TM | Tl | N | C
41	gi|473787307	AT5G50920	CLPC homologue 1	0	736/868 (85%)	787/868 (91%)	31/868 (4%)	1477	CE | TM | PM | P
37, 70	gi|473891076	AT5G37510	NADH-ubiquinone dehydrogenase, mitochondrial, putative	0	559/708 (79%)	622/708 (88%)	12/708 (2%)	1150	MM | PM
122	gi|473945885	AT5G20720	chaperonin 20	5e-118	170/253 (67%)	210/253 (83%)	6/253 (2%)	341	P | M
25, 50	gi|473965828	AT2G34420	photosystem II light harvesting complex gene B1B2	1e-165	232/266 (87%)	242/266 (91%)	2/266 (1%)	464	TM
55	gi|473983421	AT5G02500	heat shock cognate protein 70-1	0	589/681 (86%)	618/681 (91%)	39/681 (6%)	1199	PM | VM | G | P | N | C
43	gi|474012573	AT5G02500	heat shock cognate protein 70-1	0	597/651 (92%)	626/651 (96%)	4/651 (1%)	1235	PM | VM | G | P | N | C
108, 130	gi|474036467	AT5G45930	magnesium chelatase i2	0	304/382 (80%)	333/382 (87%)	1/382 (0%)	598	CS
89, 90	gi|474108806	AT5G50400	purple acid phosphatase 27	o	360/532 (68%)	432/532 (81%)	5/532 (1%)	783	E
121	gi|474121685	AT1G61520	photosystem I light harvesting complex gene 3	1e-143	198/260 (76%)	220/260 (85%)	5/260 (2%)	408	TM
143	gi|474121960	AT5G51110	Transcriptional coactivator/pterin dehydratase	3e-62	98/171 (57%)	123/171 (72%)	7/171 (4%)	195	Cl
140	gi|474145957	AT1G65980	thioredoxin-dependent peroxidase 1	2e-90	123/162 (76%)	143/162 (88%)	0/162 (0%)	264	Cl | PM
8, 105	gi|474153435	AT2G39730	rubisco activase	0	360/460 (78%)	402/460 (87%)	9/460 (2%)	754	Cl
91	gi|474198432	AT1G51980	Insulinase (Peptidase family M16) protein	1e-129	230/494 (47%)	307/494 (62%)	69/494 (14%)	389	PM | VM | M | P
7, 54, 56, 103, 118	gi|474198705	AT4G20360	RAB GTPase homolog E1B	0	297/356 (83%)	331/356 (93%)	0/356 (0%)	605	TM | CE
85	gi|474200923	AT5G42020	Heat shock protein 70 (Hsp 70) family protein	0	585/646 (91%)	617/646 (96%)	0/646 (0%)	1201	ER | PM | VM | V | N
127, 136	gi|474267868	AT1G15820	light harvesting complex photosystem II subunit 6	1e-119	165/182 (91%)	176/182 (97%)	0/182 (0%)	344	CE | TM
21	gi|474288032	AT5G50160	ferric reduction oxidase 8	4.9	24/73 (33%)	33/73 (45%)	7/73 (10%)	27.3	MM | PM
107	gi|474293105	AT2G43490	Ypt/Rab-GAP domain of gyp1p superfamily protein	7e-178	281/533 (53%)	355/533 (67%)	45/533 (8%)	535	C | M | N | PM
18, 19	gi|474352688	AT3G50820	photosystem II subunit O-2	0	260/331 (79%)	290/331 (88%)	5/331 (2%)	529	TM
124	gi|474359820	AT3G52850	vacuolar sorting receptor homolog 1	0	433/582 (74%)	495/582 (85%)	21/582 (4%)	910	PM
96, 97	gi|474407239	AT3G04550	unknown protein	7e-78	132/297 (44%)	191/297 (64%)	6/297 (2%)	249	Cl
139	gi|474410285	AT1G61620	phosphoinositide binding	6e-137	188/257 (73%)	225/257 (88%)	7/257 (3%)	401	N | C | M
48	gi|474438538	AT1G55490	chaperonin 60 beta	0	509/600 (85%)	548/600 (91%)	2/600 (0%)	991	P | PM
94	gi|474441074	AT3G13920	eukaryotic translation initiation factor 4A1	0	382/414 (92%)	400/414 (97%)	2/414 (0%)	794	C | N | PM
129	gi|475509125	AT1G77090	Mog1/PsbP/DUF1795-like photosystem II reaction center PsbP family protein	7e-115	161/217 (74%)	179/217 (82%)	2/217 (1%)	335	P
77	gi|475528285	AT5G61410	D-ribulose-5-phosphate-3-epimerase	2e-147	209/233 (90%)	220/233 (94%)	2/233 (1%)	425	Tl
137	gi|475532245	AT3G27850	ribosomal protein L12-C	3e-43	108/190 (57%)	125/190 (66%)	17/190 (9%)	146	TM
45	gi|475542357	AT1G50250	FTSH protease 1	0	464/493 (94%)	483/493 (98%)	1/493 (0%)	919	TM
53	gi|475558950	AT5G55220	trigger factor type chaperone family protein	0	270/478 (56%)	364/478 (76%)	3/478 (1%)	554	P
3, 4, 98	gi|475605012	AT2G30950	FtsH extracellular protease family	0	552/635 (87%)	584/635 (92%)	3/635 (0%)	1101	TM
132	gi|475606980	AT5G13510	Ribosomal protein L10 family protein	3e-93	130/205 (63%)	162/205 (79%)	4/205 (2%)	277	CE | R
17	gi|475610281	AT1G76080	chloroplastic drought-induced stress protein of 32 kD	5e-130	191/308 (62%)	223/308 (72%)	11/308 (4%)	376	CE
68, 69	gi|475618322	AT5G20630	germin 3	2e-59	119/249 (48%)	143/249 (57%)	43/249 (17%)	191	E
113	gi|475621613	AT1G04690	potassium channel beta subunit 1	0	279/328 (85%)	312/328 (95%)	0/328 (0%)	599	PM
49	gi|475623273	AT3G02090	Insulinase (Peptidase family M16) protein	0	330/448 (74%)	394/448 (88%)	0/448 (0%)	712	MM | PM
128	gi|536709419	AT2G48150	glutathione peroxidase 4	5e-94	128/169 (76%)	147/169 (87%)	0/169 (0%)	275	C | PM
38	gi|548319365	AT5G13650	elongation factor family protein	0	508/669 (76%)	572/669 (86%)	10/669 (1%)	1045	P
92	gi|669028025	AT1G51980	Insulinase (Peptidase family M16) protein	6e-179	272/506 (54%)	367/506 (73%)	8/506 (2%)	516	PM | M | P | VM
84	gi|669030388	AT3G48500	Nucleic acid-binding,OB-fold-like protein	0	340/604 (56%)	427/604 (71%)	15/604 (2%)	664	Cl | C | N
115, 120	gi|670020158	AT3G56650	Mog1/PsbP/DUF1795-like photosystem II reaction center PsbP family protein	8e-120	161/222 (73%)	191/222 (86%)	3/222 (1%)	347	TM | P
58	gi|671744544	AT2G39730	rubisco activase	0	339/400 (85%)	369/400 (92%)	0/400 (0%)	727	Cl
9, 11, 13, 15, 16, 22, 23, 24, 57, 60	gi|671744546	AT2G39730	rubisco activase	0	314/369 (85%)	343/369 (93%)	0/369 (0%)	677	Cl
109	gi|326503086	AT1G16880	uridylyltransferase-related	8e-126	178/244 (73%)	215/244 (88%)	7/244 (3%)	364	CE | TM
100	gi|473881976	AT5G30510	ribosomal protein S1	8e-126	265/377 (70%)	321/377 (85%)	11/377 (3%)	548	P
74	gi|474330238	AT4G15510	Photosystem II reaction center PsbP family protein	1e-95	138/196 (70%)	167/196 (85%)	0/196 (0%)	283	TM
28	1433A_HORVU	AT5G38480	general regulatory factor	3e-159	219/253 (87%)	238/253 (94%)	1/253 (0%)	447	PM | P | C | V
27	gi|326530656	AT1G73060	Low PSII Accumulation 3	7e-162	226/315 (72%)	269/315 (85%)	0/315 (0%)	464	TM
87, 149	PS4_PINST		Putative LRR disease resistance protein/transmembrane receptor kinase PS4						Unknown
